# Supplementary material
Source: PubMed Central journal article supplement (PMC11005371)
Supplement: jcm.01558-23-s0001.pdf [file jcm.01558-23-s0001.pdf]

## Supplementary Materials

### **Utilizing cost-effective portable equipment to enhance COVID-19 variant tracking both on-site and at a large scale**

Sung Yong Park<sup>1</sup>, Gina Faraci<sup>1</sup>, Pamela Ward<sup>2</sup>, and Ha Youn Lee<sup>1</sup>

<sup>1</sup>Department of Molecular Microbiology and Immunology, Keck School of Medicine, University of Southern California, Los Angeles, CA

<sup>2</sup>Department of Clinical Pathology, Keck School of Medicine, University of Southern California, Los Angeles, CA

## Control Run

The genomic RNAs of NY1-PV08001 (GenBank: MT370904.1), WI-CDC-03041142-001 (GenBank; MT039887.1), and CA-CDC-03039618-001 (GenBank: MT027062.1) were used for a control run. These genomic RNAs were provided by BEI Resources. In addition, remnant RNAs from specimens USA/CA-LAC-USC1 (GISAID: EPI\_ISL\_569664) and USA/CA-LAC-USC2 (GISAID: EPI\_ISL\_569665) were included in the control run, and both Pacbio HiFi sequencing and Sanger sequencing data were available for these specimens (1). We used the RT-PCR primers 1\_LEFT/Rev-c for the first amplicon (31-10,267), 31.5\_LEFT/67\_RIGHT for the second (9,634-20,572), and 67\_LEFT /98\_RIGHT for the third (20,173-29,866) (Supplementary Table S3). The samples were then incubated at 50 °C for 10 min, followed by 98 °C for 2 min, then 40 cycles of 98 °C for 10 sec, 55 °C for 10 sec, and 72 °C for 5 min, with a final extension of 72 °C for 5 min, and 4 °C hold until the next step. The RT-PCR products were subsequently subjected to index PCR (1).

Each amplicon of NY1-PV08001, WI-CDC-03041142-001, and CA-CDC-03039618-001 were equimolarly pooled, size-selected using E-Gel™ 1% Agarose with SYBR™ Safe dye (Thermo Fisher Scientific) and purified by pre-made washed AMPure® XP Beads (Beckman Coulter). Each amplicon of USA/CA-LAC-USC1 and USA/CA-LAC-USC2 were purified in the same manner and equimolarly pooled. A total of 450 ng of the size-selected and purified genomic RNA pool was then added to 100 ng of USA/CA-LAC-USC1 and USA/CA-LAC-USC2 pool, yielding a total of 550 ng in 47 µl. The pooled library was then subjected to Oxford Nanopore MinION library preparation using a Ligation Sequencing kit V14 (Oxford Nanopore Technologies) and NEBNext® Companion Module (NEB) as described above and sequenced via the MinION Mk1b sequencer using the R10.4.1 flow cell (Oxford Nanopore Technologies) for 72 hours.

The reference sequences of three genomic RNA strains differed from the sequences in GenBank, with NY1-PV08001 having one mutation, WI-CDC-03041142-001 having two mutations and 9 deletions, and CA-CDC-03039618-00 having one mutation. We confirmed these differences through Sanger sequencing (Supplementary Figure S1). The reference sequence of USA/CA-LAC-USC2 had two mutations in comparison to the Pacbio HiFi sequencing data. These mutations were verified by the presence of double peaks in the Sanger chromatogram data (Supplementary Figure S2).

## Phylogenetic tree analysis

The phylogenetic trees were built using MAFFT (version 7.392)(2) and FastTree (version 2.1.8) (3). The sequence obtained by our portable system (TU5327) was aligned with 813 sequences collected in December 2022 in Los Angeles, California, USA using MAFFT (version 7.392) (2). The Los Angeles sequences were retrieved from the GISAID (4), filtered by location “North America / USA / California / LOS ANGELES” and collection date between December 1<sup>st</sup>, 2022 and December 31<sup>st</sup>, 2022. The resulting alignment was used as input for FastTree (version 2.1.8) (3) to construct the maximum likelihood phylogenetic tree, which was then visualized using FigTree (version 1.4.4).

We aligned the 289 SARS-CoV-2 whole genome sequences with the reference sequence Wuhan-Hu-1 (MN908947), as well as with representative sequences of the Alpha (GISAID: EPI\_ISL\_751801, EPI\_ISL\_802601, EPI\_ISL\_802614, EPI\_ISL\_802617 and EPI\_ISL\_802618) Beta (EPI\_ISL\_1011702, EPI\_ISL\_890360, EPI\_ISL\_911874, EPI\_ISL\_911912 and EPI\_ISL\_955107), Gamma (EPI\_ISL\_1493886, EPI\_ISL\_1555711, EPI\_ISL\_1557003, EPI\_ISL\_1576115 and EPI\_ISL\_1613185) Delta (EPI\_ISL\_1562503 EPI\_ISL\_1614854,

EPI\_ISL\_1666166, EPI\_ISL\_1666372 and EPI\_ISL\_1666373) and Omicron variants (EPI\_ISL\_10084178, EPI\_ISL\_10084186, EPI\_ISL\_10722651, EPI\_ISL\_11342896 and EPI\_ISL\_8290981) and TU5327 using MAFFT (2). The maximum likelihood of all these sequences was also obtained by FastTree (3) and FigTree. The variant composition was compared with that of 1,918 sequences which were downloaded from the GISAID database (4). Samples were filtered by location “North America / USA / California / LOS ANGELES” and collection date between December 1<sup>st</sup>, 2020 and December 31<sup>st</sup>, 2020.

| <b>Sample</b> | <b>Collection date</b> | <b>Cycle threshold</b> | <b>PANGO lineage</b> |
|---------------|------------------------|------------------------|----------------------|
| JI4231        | 12/30/20               | 14.32                  | B.1.429              |
| WT9794        | 12/5/20                | 15.54                  | B.1.429              |
| HP7395        | 12/30/20               | 19.49                  | B.1.2                |
| DII136        | 12/22/20               | 18.41                  | B.1.240              |
| HW8248        | 12/30/20               | 17.78                  | B.1.232              |
| JB3588        | 12/18/20               | 19.97                  | B.1.2                |
| WM7065        | 12/30/20               | 17.7                   | B.1.2                |
| BT9716        | 12/23/20               | 17.19                  | B.1.2                |
| HK5693        | 12/23/20               | 12.62                  | B.1.599              |
| VL0369        | 12/23/20               | 14.1                   | B.1.401              |
| JY5514        | 12/23/20               | 19.63                  | B.1.36.8             |
| BJ9010        | 12/23/20               | 16.4                   | B.1.2                |
| SD0040        | 12/24/20               | 19.47                  | B.1.399              |
| AY5172        | 12/26/20               | 14.34                  | B.1.2                |
| PA1164        | 12/26/20               | 15                     | B.1.369              |
| DY5573        | 12/27/20               | 18.15                  | B.1.2                |
| DC9155        | 12/26/20               | 14.44                  | B.1.427              |
| RP9716        | 12/29/20               | 17.28                  | B.1.2                |
| VX9670        | 12/29/20               | 14.98                  | B.1.429              |
| PI0188        | 12/29/20               | 19.54                  | B.1.243              |
| ZY3992        | 12/29/20               | 21.39                  | B.1.429              |
| ZB9727        | 12/29/20               | 18.24                  | B.1.400              |
| JX2247        | 11/30/20               | 16.02                  | B.1.558              |
| LP5275        | 11/22/20               | 15.81                  | B.1.2                |
| ER2730        | 11/23/20               | 21.05                  | B.1.429              |
| IO7000        | 12/18/20               | 17.94                  | B.1.429              |
| AM7038        | 12/20/20               | 20.56                  | B.1.429              |
| OII405        | 12/23/20               | 13.94                  | B.1.429              |
| ST2570        | 12/21/20               | 21.64                  | B.1.429              |
| DR5866        | 11/30/20               | 20.1                   | B.1.558              |
| CZ6308        | 12/22/20               | 13.73                  | B.1.2                |
| VI9997        | 12/22/20               | 16.3                   | B.1.429              |
| UV5412        | 12/13/20               | 15.65                  | B.1                  |
| BK9318        | 1/2/21                 | 15.59                  | B.1.1.368            |
| NU1669        | 12/14/20               | 15.22                  | B.1.427              |
| XC3154        | 12/14/20               | 15.17                  | B.1.1.416            |
| YG2693        | 12/14/20               | 14.66                  | B.1.1.1              |
| NJ3527        | 12/21/20               | 17.58                  | B.1.429              |

|        |          |       |           |
|--------|----------|-------|-----------|
| LQ2216 | 12/22/20 | 21.49 | B.1.2     |
| GU3382 | 1/5/21   | 15.71 | B.1.2     |
| IE8550 | 1/5/21   | 12.47 | B.1       |
| MD0767 | 12/22/20 | 19.36 | B.1.1.519 |
| XT7543 | 1/5/21   | 19.51 | B.1       |
| SF8699 | 1/5/21   | 15.23 | B.1.429   |
| UK3603 | 1/4/21   | 19.04 | B.1.2     |
| AJ3420 | 1/2/21   | 19.49 | B.1.2     |
| IG1625 | 12/18/20 | 15.87 | B.1.232   |
| TG0776 | 12/8/20  | 16.43 | B.1.609   |
| TX1840 | 12/17/20 | 19.53 | B.1.349   |
| EM5221 | 12/20/20 | 17.72 | B.1.429   |
| PP4204 | 12/18/20 | 14.02 | B.1.1     |
| FW3867 | 12/20/20 | 18.71 | B.1.1     |
| UZ0290 | 12/20/20 | 19.21 | B.1.2     |
| VI5908 | 12/21/20 | 12.08 | B.1.429   |
| AQ6479 | 12/20/20 | 13.74 | B.1.1.368 |
| AE8847 | 12/23/20 | 15.68 | B.1.2     |
| FT0593 | 1/5/21   | 21.23 | B.1.1.222 |
| PU3006 | 12/14/20 | 15.45 | B.1.599   |
| OH7436 | 12/28/20 | 16.84 | B.1.609   |
| ZY8808 | 12/26/20 | 19.47 | C.23      |
| BT5819 | 11/23/20 | 22.33 | B.1.429   |
| BA9193 | 11/30/20 | 17.21 | B.1.596   |
| SJ9593 | 11/30/20 | 20.69 | B.1.509   |
| AQ1668 | 12/29/20 | 18.72 | B.1.429   |
| OL0708 | 12/29/20 | 22.41 | B.1.429   |
| QR8696 | 1/3/21   | 19.41 | B.1.2     |
| AZ9519 | 12/31/20 | 12.89 | B.1.429   |
| SH0093 | 12/24/20 | 14.02 | B.1.429   |
| OF5260 | 12/14/20 | 14.18 | B.1.429   |
| RC7357 | 1/5/21   | 13.2  | B.1.429   |
| TL0675 | 1/5/21   | 15.87 | B.1.427   |
| CZ0687 | 12/14/20 | 16.98 | B.1.1     |
| JB6682 | 12/14/20 | 16.2  | B.1.429   |
| HB7777 | 12/14/20 | 19.54 | B.1.2     |
| MV2051 | 12/25/20 | 15.11 | B.1.240   |
| NZ1546 | 12/14/20 | 19.2  | B.1.240   |
| BE3032 | 1/1/21   | 19.68 | B.1.2     |
| HF6439 | 12/22/20 | 19.53 | B.1.243   |

|        |          |       |           |
|--------|----------|-------|-----------|
| AC7433 | 12/14/20 | 12.44 | B.1.551   |
| TL1929 | 12/25/20 | 17.07 | B.1.243   |
| XB2178 | 12/6/20  | 19.24 | B.1       |
| AU4629 | 12/5/20  | 21.88 | B.1.2     |
| GM1395 | 12/19/20 | 14.93 | B.1.561   |
| WK0961 | 12/30/20 | 18.97 | B.1.2     |
| SG7359 | 12/24/20 | 20.95 | B.1.243   |
| DN9420 | 12/27/20 | 19.27 | B.1.429   |
| ZR6613 | 12/24/20 | 17    | B.1.429   |
| LZ3639 | 12/18/20 | 15.89 | B.1.2     |
| DH6456 | 12/29/20 | 24.61 | B.1.369   |
| JF9721 | 12/18/20 | 19.86 | B.1.239   |
| FP1386 | 12/28/20 | 15.65 | B.1.561   |
| ZD3133 | 12/31/20 | 21.97 | B.1.429   |
| MA6919 | 1/5/21   | 17.92 | B.1.2     |
| YT2631 | 12/28/20 | 18.43 | B.1.427   |
| JS2952 | 1/5/21   | 17.61 | B.1.1.519 |
| WG5887 | 1/5/21   | 16.11 | B.1.429   |
| XB2794 | 12/18/20 | 15.26 | B.1.2     |
| VD6385 | 11/25/20 | 13.33 | B.1.243   |
| CB3852 | 11/30/20 | 18.77 | B.1.2     |
| VW7371 | 12/28/20 | 15.08 | B.1.429   |
| JV9281 | 12/29/20 | 18.04 | B.1.429   |
| AE4035 | 12/28/20 | 22.05 | B.1.609   |
| IT0677 | 12/21/20 | 16.24 | B.1.369   |
| VJ4966 | 12/21/20 | 16.92 | B.1.232   |
| XZ4820 | 12/21/20 | 16.87 | B.1.2     |
| YU9159 | 12/22/20 | 17.19 | B.1.429   |
| YC7172 | 12/21/20 | 19.85 | B.1.427   |
| TH3913 | 12/22/20 | 15.85 | B.1.1.368 |
| TH6141 | 12/22/20 | 20.97 | B.1.427   |
| KO6851 | 12/17/20 | 16.01 | B.1.369   |
| LL2086 | 12/15/20 | 19    | B.1.509   |
| WV6072 | 12/20/20 | 20.49 | B.1.243   |
| SY3098 | 12/21/20 | 21.44 | B.1.2     |
| XS8393 | 12/15/20 | 14.45 | B.1.239   |
| ZT2608 | 12/29/20 | 14.24 | B.1.427   |
| JG6758 | 11/25/20 | 14.92 | B.1.429   |
| JR7525 | 12/29/20 | 19.53 | B.1.429   |
| BM0491 | 12/14/20 | 17.64 | B.1.232   |

|        |          |       |           |
|--------|----------|-------|-----------|
| ZP1354 | 12/14/20 | 15.94 | B.1.429   |
| UY1184 | 1/2/21   | 18.2  | B.1.429   |
| IR5477 | 12/14/20 | 13.78 | B.1.599   |
| MU8683 | 12/13/20 | 18.12 | B.1.599   |
| RY9761 | 1/1/21   | 19.34 | B.1.234   |
| BB6627 | 12/13/20 | 19.22 | B.1.429   |
| DK0381 | 12/24/20 | 11.97 | B.1.2     |
| ZD7446 | 12/24/20 | 19.21 | B.1.429   |
| LH8066 | 12/22/20 | 18.76 | B.1.2     |
| FH3885 | 12/24/20 | 17.39 | B.1.2     |
| UQ0627 | 12/29/20 | 19.47 | B.1.429   |
| WP7246 | 12/21/20 | 12.16 | B.1.429   |
| UI5090 | 1/4/21   | 14.4  | B.1.429   |
| KQ8979 | 12/19/20 | 16.37 | B.1.429   |
| LS1200 | 12/19/20 | 14.03 | B.1.429   |
| GD7333 | 12/5/20  | 16.34 | B.1.1.222 |
| BY6561 | 12/19/20 | 15.3  | B.1.427   |
| GW7911 | 12/31/20 | 15.01 | B.1.1.432 |
| GE5311 | 1/1/21   | 14.47 | B.1.243   |
| LG9653 | 12/15/20 | 18.34 | B.1.2     |
| JG8980 | 12/28/20 | 16.62 | B.1.429   |
| UH0983 | 1/5/21   | 18.31 | B.1.558   |
| LM6779 | 12/28/20 | 17.98 | B.1.241   |
| ZR9776 | 12/21/20 | 15.83 | B.1.2     |
| XE8272 | 12/15/20 | 21.48 | B.1.429   |
| YP5963 | 12/24/20 | 17.81 | B.1.429   |
| BU6467 | 12/21/20 | 18.48 | B.1.1.239 |
| VE8901 | 12/21/20 | 23.06 | B.1.599   |
| VY0153 | 12/18/20 | 16.72 | B.1.429   |
| WU7415 | 12/21/20 | 16.1  | B.1.2     |
| JX8470 | 12/21/20 | 19.46 | B.1.2     |
| ER9825 | 12/14/20 | 16.5  | B.1.36.8  |
| HX9272 | 12/24/20 | 16.33 | B.1.126   |
| GE6816 | 12/29/20 | 14.01 | B.1.427   |
| SY0553 | 12/29/20 | 18.87 | B.1.240   |
| TN1225 | 12/23/20 | 17.51 | B.1.401   |
| RT5697 | 11/23/20 | 16.73 | B.1.1.228 |
| TL6974 | 12/28/20 | 20.17 | B.1.2     |
| BK9278 | 12/29/20 | 16.57 | B.1.429   |
| YM6123 | 12/22/20 | 14.92 | B.1.429   |

|        |          |       |         |
|--------|----------|-------|---------|
| GA6643 | 12/14/20 | 15.69 | B.1.602 |
| EI0462 | 12/29/20 | 21.67 | B.1.400 |
| KM8670 | 12/15/20 | 21.15 | B.1.429 |
| SB8937 | 12/29/20 | 21.38 | B.1.429 |
| WB5319 | 11/30/20 | 18.64 | B.1.234 |
| LG1147 | 12/6/20  | 16.22 | B.1.243 |
| EQ4052 | 12/25/20 | 16.77 | B.1.599 |
| RT8658 | 12/23/20 | 18.57 | B.1.126 |
| YE0245 | 1/1/21   | 11.63 | B.1.2   |
| JY7656 | 12/24/20 | 15.47 | B.1.2   |
| CC3805 | 12/15/20 | 11.96 | B.1.427 |
| BG0216 | 12/23/20 | 18.25 | B.1.429 |
| RZ5476 | 12/23/20 | 21.19 | B.1.429 |
| FH1865 | 12/25/20 | 19.56 | B.1.429 |
| OY4586 | 12/5/20  | 20.64 | B.1.2   |
| OK0835 | 12/24/20 | 18.08 | B.1.2   |
| CA3649 | 12/23/20 | 20.23 | B.1.240 |
| FQ3697 | 12/29/20 | 16.9  | B.1.243 |
| JA4776 | 12/20/20 | 17.08 | B.1.429 |
| GU2976 | 12/24/20 | 17.36 | B.1     |
| RY2179 | 12/5/20  | 19.81 | B.1.2   |
| WE4882 | 12/22/20 | 16.73 | B.1.2   |
| PV3046 | 12/15/20 | 17.24 | B.1.427 |
| NH4027 | 12/22/20 | 13.86 | B.1     |
| EG7205 | 12/22/20 | 15.03 | B.1.2   |
| IY0010 | 12/21/20 | 16.46 | B.1.427 |
| EI9700 | 12/24/20 | 15.04 | B.1     |
| LH4400 | 12/18/20 | 15.83 | B.1.609 |
| ZT8055 | 12/25/20 | 15.33 | B.1.429 |
| OM4070 | 12/23/20 | 18.53 | B.1.429 |
| KP9073 | 1/5/21   | 18.06 | B.1.427 |
| SG2753 | 12/20/20 | 17.18 | B.1.429 |
| YF7950 | 11/22/20 | 14.97 | B.1.429 |
| CL5555 | 12/21/20 | 18.51 | B.1.609 |
| DD8748 | 1/3/21   | 17.84 | B.1.2   |
| HV1419 | 12/29/20 | 23.23 | B.1.561 |
| TR3003 | 12/24/20 | 17.32 | B.1.2   |
| CZ6426 | 12/29/20 | 13.99 | B.1     |
| KF5703 | 1/5/21   | 22.77 | B.1.429 |
| ZI1686 | 12/25/20 | 21.88 | B.1.429 |



|        |          |       |           |
|--------|----------|-------|-----------|
| RE5900 | 12/14/20 | 19.31 | B.1.1.368 |
| BQ1903 | 12/21/20 | 11.17 | B.1.429   |
| MP9758 | 12/29/20 | 21.95 | B.1.400   |
| IZ7944 | 12/23/20 | 15.6  | B.1.126   |
| QI9870 | 12/13/20 | 14.76 | B.1.2     |
| HK8609 | 12/24/20 | 13.72 | B.1.2     |
| VH6355 | 12/14/20 | 14.26 | B.1.429   |
| GC0577 | 1/3/21   | 12.96 | B.1.429   |
| AN4673 | 12/18/20 | 14.55 | B.1.2     |
| CO5183 | 12/25/20 | 14.69 | B.1.126   |
| TN0136 | 12/25/20 | 13.15 | B.1.429   |
| SB9300 | 12/24/20 | 14.72 | B.1.1.316 |
| AP1804 | 12/29/20 | 19.8  | B.1.2     |
| MJ2769 | 12/28/20 | 17.17 | B.1.2     |
| ZW9807 | 12/27/20 | 15.15 | B.1.429   |
| DV4052 | 12/26/20 | 15.05 | B.1.429   |
| ZY7185 | 12/26/20 | 20.34 | B.1.429   |
| RM9602 | 1/5/21   | 24.24 | B.1.429   |
| YZ4434 | 12/31/20 | 18.45 | B.1.1.192 |
| WX7713 | 12/22/20 | 16.2  | B.1.429   |
| NF7093 | 12/23/20 | 19.05 | B.1.1     |
| GO2530 | 12/22/20 | 18.49 | B.1.349   |
| SS5859 | 1/5/21   | 20.84 | B.1.2     |
| WJ1864 | 12/22/20 | 17.68 | B.1.2     |
| WQ5202 | 12/22/20 | 14.37 | B.1.429   |
| OW1668 | 12/22/20 | 16.83 | B.1.429   |
| NJ1057 | 12/22/20 | 17.04 | B.1.561   |
| QN1684 | 12/23/20 | 14.7  | B.1.240   |
| LF5356 | 12/23/20 | 16.56 | B.1.429   |
| HW7458 | 12/28/20 | 14.62 | B.1.429   |
| IY3432 | 11/23/20 | 15.96 | B.1.1.207 |
| MF6738 | 12/25/20 | 13.86 | B.1.234   |
| KR9652 | 12/29/20 | 14.51 | B.1.397   |
| TX5558 | 12/20/20 | 20.32 | B.1.2     |
| RO7972 | 11/23/20 | 17.36 | B.1.561   |
| WO4840 | 1/4/21   | 16.82 | B.1.243   |
| NB3224 | 11/30/20 | 17.44 | B.1.2     |
| IR7746 | 12/24/20 | 19.94 | B.1.1.518 |
| FH0323 | 12/23/20 | 14.57 | B.1.240   |
| WU1409 | 12/15/20 | 17.89 | B.1.1     |

|        |          |       |           |
|--------|----------|-------|-----------|
| KF9092 | 12/26/20 | 14.98 | B.1.429   |
| SJ7550 | 12/26/20 | 18.84 | B.1.429   |
| NB3353 | 12/26/20 | 16.64 | B.1.2     |
| FK2454 | 12/27/20 | 19.38 | B.1.429   |
| CS9782 | 12/18/20 | 18.65 | B.1.1.186 |
| LA0793 | 12/18/20 | 15.41 | B.1.429   |
| YF3796 | 12/22/20 | 18.66 | B.1.1.207 |
| OB9346 | 1/5/21   | 17.35 | B.1.2     |
| VZ6626 | 12/15/20 | 14.34 | B.1.2     |
| WO8999 | 12/23/20 | 11.79 | B.1.1.519 |
| LB5198 | 12/23/20 | 14.74 | B.1.429   |
| CX9666 | 12/15/20 | 19.68 | B.1.429   |
| JS3494 | 12/15/20 | 19.31 | B.1.427   |
| GS2239 | 12/17/20 | 12.73 | B.1.126   |
| YV9735 | 12/22/20 | 16.41 | B.1       |
| FS8456 | 12/22/20 | 12.07 | B.1.1     |
| SA0118 | 12/31/20 | 17.19 | B.1.429   |
| KI6491 | 12/24/20 | 19.37 | B.1.577   |
| KB9241 | 12/8/20  | 21.94 | B.1.429   |
| IZ4921 | 1/5/21   | 15.49 | B.1.400   |
| VX0120 | 12/20/20 | 15    | B.1.2     |
| ZU5381 | 1/2/21   | 16.63 | B.1.2     |
| LB1380 | 12/8/20  | 17.65 | B.1.2     |
| UQ7244 | 1/5/21   | 16.28 | B.1.429   |
| BQ7044 | 12/21/20 | 14.97 | B.1       |
| XZ0118 | 12/24/20 | 15.58 | B.1.2     |
| BU9246 | 12/18/20 | 14.42 | B.1.2     |
| RS1309 | 12/26/20 | 17.2  | B.1.126   |
| BA2093 | 12/30/20 | 19.39 | B.1.2     |
| ZN5315 | 12/26/20 | 20.21 | B.1.429   |
| NY0181 | 12/15/20 | 17.88 | B.1.429   |
| JB8183 | 12/23/20 | 18.91 | B.1.240   |
| DC1144 | 12/20/20 | 17.57 | B.1.2     |
| ME8933 | 12/24/20 | 19.49 | B.1.421   |
| UO1382 | 12/22/20 | 18.05 | B.1.2     |
| NN8987 | 12/29/20 | 14.52 | B.1       |
| MD0278 | 12/29/20 | 18.64 | B.1.2     |
| KG5869 | 12/29/20 | 14.5  | B.1.429   |
| NA5237 | 12/29/20 | 16.36 | B.1.429   |
| NG5256 | 12/29/20 | 17.89 | B.1.429   |

|        |          |       |           |
|--------|----------|-------|-----------|
| AI7563 | 12/29/20 | 16.73 | B.1.400   |
| DA4871 | 12/22/20 | 20.69 | B.1.2     |
| XU6832 | 12/21/20 | 21.02 | B.1.429   |
| TZ2082 | 12/5/20  | 20.6  | B.1.1.432 |
| PF7567 | 12/13/20 | 14.67 | B.1.2     |
| AQ3327 | 12/14/20 | 16.4  | B.1.429   |
| TZ9744 | 12/29/20 | 16.63 | B.1.429   |
| XT4197 | 12/13/20 | 14.85 | B.1.2     |
| TN6172 | 12/29/20 | 24.2  | B.1.2     |
| RE3176 | 12/29/20 | 22.96 | B.1.429   |
| PF5717 | 12/21/20 | 17.17 | B.1.429   |

---

**Supplementary Table S1.** COVID-19 remnant NO/OP specimens' collection date, cycle threshold, and PANGO lineage (5).

| <b>Number</b> | <b>Name</b>                                                       | <b>Company (Country)</b>                              |
|---------------|-------------------------------------------------------------------|-------------------------------------------------------|
| 1             | Biohazard waste container                                         | ULINE (USA)                                           |
| 2             | Filtered pipette tips (1 to 20 µL)                                | USA Scientific (USA)                                  |
| 2             | Filtered pipette tips (1 to 200 µL)                               | USA Scientific (USA)                                  |
| 2             | Filtered pipette tips (100 to 1000 µL)                            | USA Scientific (USA)                                  |
| 3             | Nitrile Exam Gloves                                               | Fisher Scientific (USA)                               |
| 4a            | 96-well PCR Plate                                                 | ThermoFisher Scientific (USA)                         |
| 4b            | DynaMag™-2 Magnet                                                 | ThermoFisher Scientific (USA)                         |
| 5             | Magnetic Stand-96                                                 | ThermoFisher Scientific (USA)                         |
| 6             | Nuclease-Free Water (not DEPC-Treated)                            | ThermoFisher Scientific (USA)                         |
| 7             | Qubit™ 1X dsDNA High Sensitivity (HS) Assay Kit                   | ThermoFisher Scientific (USA)                         |
| 8             | 80-well 1.5 mL tube rack                                          | VWR International (USA)                               |
| 8             | DNA LoBind® 1.5 mL tubes                                          | Eppendorf (Germany)                                   |
| 8             | Qubit™ Assay Tubes                                                | ThermoFisher Scientific (USA)                         |
| 8             | QIAamp Viral RNA Mini Kit                                         | Qiagen (Maryland, USA)                                |
| 8             | Ethyl alcohol, Pure, 200 proof, for molecular biology             | Sigma-Aldrich (Missouri, USA)                         |
| 8             | Mineral Oil, BioReagent, for molecular biology, light oil         | Sigma-Aldrich (Missouri, USA)                         |
| 8             | RT-PCR Primers                                                    | Integrated DNA Technologies (New Jersey, USA)         |
| 8             | Agencourt AMPure® XP Beads                                        | Beckman Coulter (California, USA)                     |
| 9             | Cooling Chamber                                                   | Diversified Biotech (Massachusetts, USA)              |
| 9             | Nordic Ice Gel Pack                                               | Nordic Cold Chain Solutions (Pennsylvania, USA)       |
| 9             | 0.2 mL PCR tubes                                                  | USA Scientific (Florida, USA)                         |
| 9             | SuperScript™ IV One-Step RT-PCR System                            | ThermoFisher Scientific (Massachusetts, USA)          |
| 10            | Westinghouse iGen300s Portable Power Station                      | Westinghouse Electric Corporation (Pennsylvania, USA) |
| 11            | Tabletop Centrifuge                                               | Fisher Scientific (Massachusetts, USA)                |
| 12            | Tabletop Vortex Mixer                                             | Fisher Scientific (Massachusetts, USA)                |
| 13            | Qubit™ 4 Fluorometer                                              | ThermoFisher Scientific (Massachusetts, USA)          |
| 14            | Laptop (Alienware m15 R7 i9 12900H 3070Ti(8GB) 32GB DDR5 1TB SSD) | Dell Technologies (Texas, USA)                        |
| 15            | Finnpipette™ F2 (1 to 10 µL)                                      | ThermoFisher Scientific (Massachusetts, USA)          |
| 15            | Finnpipette™ F2 (10 to 100 µL)                                    | ThermoFisher Scientific (Massachusetts, USA)          |
| 15            | Finnpipette™ F2 (100 to 1000 µL)                                  | ThermoFisher Scientific (Massachusetts, USA)          |
| 16            | PocketPCR Machine                                                 | GaudiLabs LLC (Luzern, Switzerland)                   |

|    |                                                                                 |                                              |
|----|---------------------------------------------------------------------------------|----------------------------------------------|
| 16 | USB Type-C to USB-A cable                                                       | Amazon (Washington, USA)                     |
| 17 | Ligation Sequencing Kit V14                                                     | Oxford Nanopore Technologies (Oxford, UK)    |
| 17 | NEBNext® Companion Module for Oxford Nanopore Technologies® Ligation Sequencing | New England Biolabs (Massachusetts, USA)     |
| 17 | UltraPure™ BSA (50 mg/mL)                                                       | ThermoFisher Scientific (Massachusetts, USA) |
| 18 | Flow Cell Wash Kit                                                              | Oxford Nanopore Technologies (Oxford, UK)    |
| 19 | MinION Sequencing Device Mk1b                                                   | Oxford Nanopore Technologies (Oxford, UK)    |
| 19 | Flow Cell (R10.4.1)                                                             | Oxford Nanopore Technologies (Oxford, UK)    |

**Supplementary Table S2.** Components of portable laboratory for COVID-19 variant tracking.

| <b>Name</b>    | <b>Direction</b> | <b>Position</b> | <b>Sequence</b>                             |
|----------------|------------------|-----------------|---------------------------------------------|
| 1_LEFT-IF11    | Forward          | 31-54           | AGTTAGTGATTAACCAACCAACTTTCGATCTCTTGT        |
| Rev-c-IR1      | Reverse          | 10,244-10,267   | GGTGTCTTTGTGACCAGCCTGTACCAAGAAATTATG        |
| 31.5_LEFT-IF11 | Forward          | 9,634-9,658     | AGTTAGTGATTAAGCACATATTCAGTGGATGGTTATG       |
| 67_RIGHT-IR1   | Reverse          | 20,543-20,572   | GGTGTCTTTGTGCAACCTTAGAAACTACAGATAAATCTTGGG  |
| 67_LEFT-IF11   | Forward          | 20,173-20,200   | AGTTAGTGATTAGTTGTCCAACAATTACCTGAAACTTACT    |
| 98_RIGHT-IR1   | Reverse          | 29,837-29,866   | GGTGTCTTTGTGTTCTCCTAAGAAGCTATTTAAAATCACATGG |
| 1_LEFT         | Forward          | 31-54           | ACCAACCAACTTTCGATCTCTTGT                    |
| For-c          | Forward          | 381-404         | TATCAGAGGCACGTCAACATCTTA                    |
| Rev-c          | Reverse          | 10,244-10,267   | ACCAGCCTGTACCAAGAAATTATG                    |
| 31.5_LEFT      | Forward          | 9,634-9,658     | AGCACATATTCAGTGGATGGTTATG                   |
| 67_RIGHT       | Reverse          | 20,543-20,572   | CAACCTTAGAAACTACAGATAAATCTTGGG              |
| 67_LEFT        | Forward          | 20,173-20,200   | GTTGTCCAACAATTACCTGAAACTTACT                |
| 98_RIGHT       | Reverse          | 29,837-29,866   | TTCTCCTAAGAAGCTATTTAAAATCACATGG             |
| 91_LEFT-mod    | Forward          | 27,449-27,469   | ACTACCAAGAGTGTGTTAGAG                       |
| 39_LEFT-mod    | Forward          | 11,562-11,584   | GCCCTATTTTCTTCATAACTGGT                     |
| 73_LEFT-mod    | Forward          | 21,969-21,991   | GTAATGATCCATTTTTGGGTGTT                     |
| 36_LEFT        | Forward          | 10,666-10,688   | ACACACCACTGGTTGTTACTCAC                     |
| 78_LEFT        | Forward          | 23,443-23,466   | CAACTTACTCCTACTTGGCGTGT                     |
| 34_LEFT        | Forward          | 10,076-10,099   | TCCCATCTGGTAAAGTTGAGGGT                     |

**Supplementary Table S3.** Primers' direction, position and sequence.

| Country            | A.2.5 sequences in GISAID(4) | Sequenced cases (4) | Confirmed cases (6, 7) | Estimated A.2.5 cases with 95% confidence interval | Proportion of A.2.5 sequences |
|--------------------|------------------------------|---------------------|------------------------|----------------------------------------------------|-------------------------------|
| Czech Republic     | 1                            | 3,398               | 924,616                | 272 [0 – 805]                                      | 0.03%                         |
| Guyana             | 1                            | 3                   | 11,737                 | 3,912 [0 – 10,173]                                 | 33.33%                        |
| Honduras           | 1                            | 29                  | 122,721                | 4,232 [0 – 12,382]                                 | 3.45%                         |
| Japan              | 1                            | 28,568              | 532,868                | 19 [0 – 55]                                        | 0.00%                         |
| Netherlands        | 1                            | 28,225              | 857,953                | 30 [0 – 90]                                        | 0.00%                         |
| New Zealand        | 1                            | 217                 | 527                    | 2 [0 – 7]                                          | 0.46%                         |
| Rwanda             | 1                            | 124                 | 19,093                 | 154 [0 – 455]                                      | 0.81%                         |
| Sint Maarten       | 2                            | 180                 | 794                    | 9 [0 - 21]                                         | 1.11%                         |
| Australia          | 3                            | 883                 | 1,775                  | 6 [0 – 13]                                         | 0.34%                         |
| Luxembourg         | 3                            | 5,288               | 23,568                 | 13 [0 – 29]                                        | 0.06%                         |
| Portugal           | 3                            | 5,774               | 432,870                | 225 [0 – 479]                                      | 0.05%                         |
| Suriname           | 3                            | 72                  | 11,522                 | 480 [0 – 1,012]                                    | 4.17%                         |
| Colombia           | 4                            | 382                 | 2,039,827              | 21,359 [537 – 42,181]                              | 1.05%                         |
| Dominican Republic | 4                            | 36                  | 134,882                | 14,987 [1,140 – 28,834]                            | 11.11%                        |
| Spain              | 4                            | 20,437              | 1,835,956              | 359 [7 – 712]                                      | 0.02%                         |
| Germany            | 6                            | 118,506             | 1,949,303              | 99 [20 – 178]                                      | 0.01%                         |
| Paraguay           | 6                            | 133                 | 279,338                | 12,602 [2,748 – 22,455]                            | 4.51%                         |
| Chile              | 7                            | 1426                | 853,090                | 4,188 [1,093 – 7,282]                              | 0.49%                         |
| United Kingdom     | 9                            | 261,973             | 1,958,705              | 67 [23 – 111]                                      | 0.00%                         |
| Argentina          | 9                            | 874                 | 2,463,496              | 25,368 [8,880 – 41,856]                            | 1.03%                         |
| Ecuador            | 14                           | 338                 | 222,608                | 9,220 [4,492 – 13,949]                             | 4.14%                         |
| Mexico             | 17                           | 7875                | 1,011,635              | 2,184 [1,147 – 3,221]                              | 0.22%                         |
| Canada             | 41                           | 21,551              | 812,077                | 1,545 [1,073 – 2,017]                              | 0.19%                         |
| Italy              | 45                           | 24,610              | 2,102,281              | 3,844 [2,722 – 4,966]                              | 0.18%                         |
| Cuba               | 59                           | 620                 | 144,013                | 13,705 [10,378 – 17,031]                           | 9.52%                         |
| Costa Rica         | 132                          | 356                 | 138,526                | 51,364 [44,413 – 58,314]                           | 37.08%                        |
| Panama             | 138                          | 160                 | 136,536                | 117,762 [110,477 – 125,048]                        | 86.25%                        |
| US                 | 529                          | 359,148             | 13,146,210             | 19,364 [17,715 – 21,021]                           | 0.15%                         |

**Supplementary Table S4.** Countries with A.2.5 cases between January and June 2021.

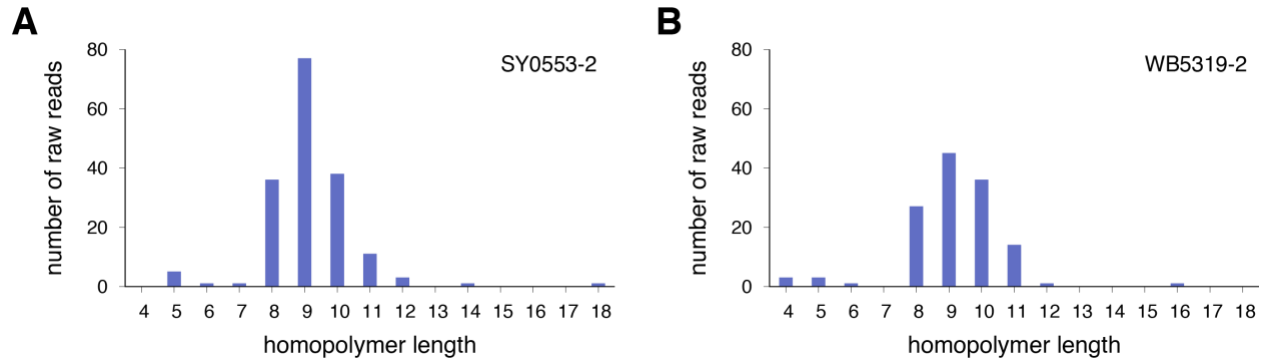

**Supplementary Figure S1. Homopolymer length distributions and error corrections**

(A) For the second segment of SY0553, the homopolymer sequence ‘TCTTTTTTTTTATG’, with a length of 9, was the most frequently observed, occurring in 77 raw reads. The number of raw reads with homopolymer lengths 10, 11, 12 were 38, 11, and 3, respectively. Given that the total for these lengths, 52 (sum of 38, 11, 3), exceeds 55% of 77 (=42.4), the homopolymer length of the consensus sequence was assigned as 10, resulting in the sequence ‘TCTTTTTTTTTATG’. (B) The most frequent length the same homopolymer ‘TCTTTTTTTTTATG’ within the second segment WB5319 was 9 with 45 raw reads. The number of raw reads with homopolymer lengths 10, 11, 12 were 36, 14, and 1, respectively. Therefore, the homopolymer length was assigned as 10, resulting in the sequence ‘TCTTTTTTTTTATG’.



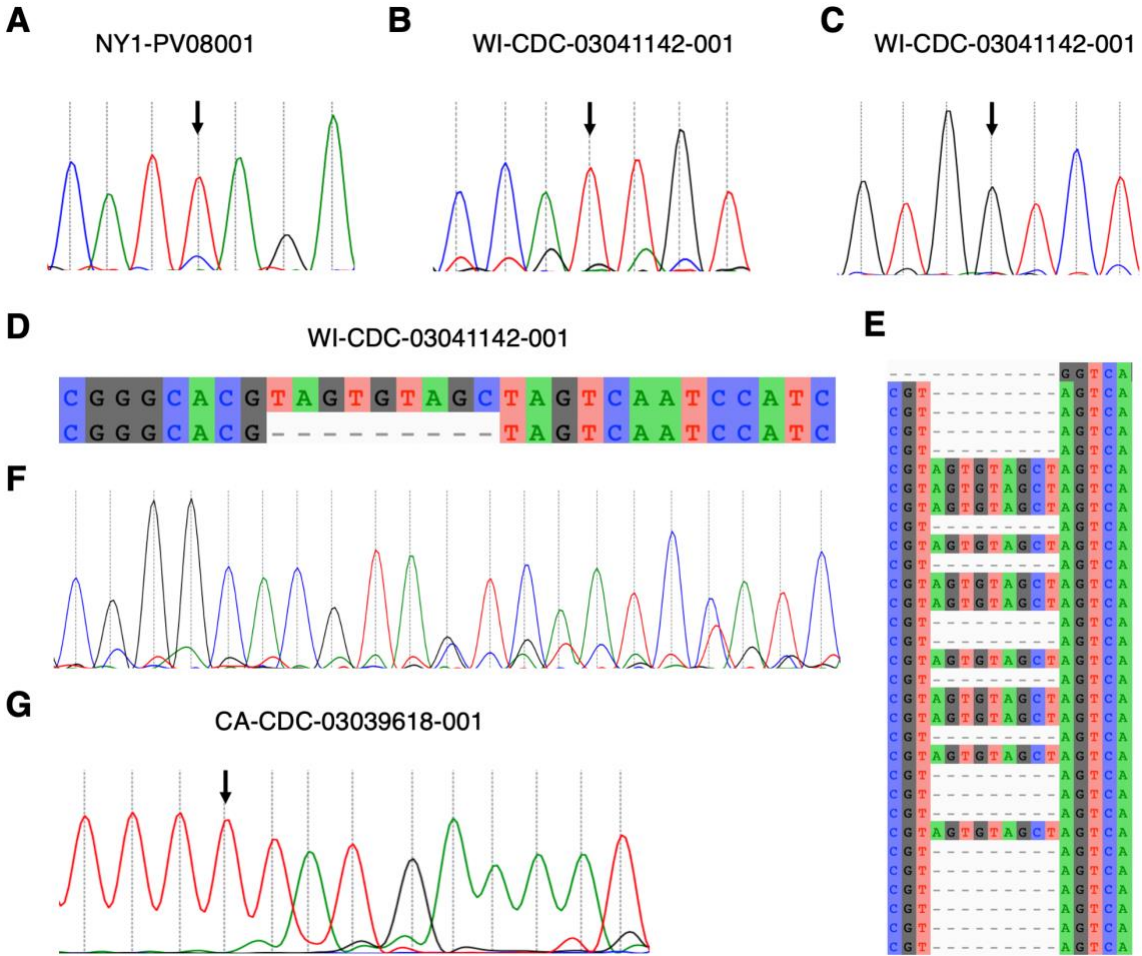

**Supplementary Figure S2. Sanger chromatogram of control genomic RNAs**

(A) Sanger sequencing chromatogram data for the genomic RNA of NY1-PV08001 (GenBank: MT370904.1), plotted by UGENE. Each of nucleotide bases, A, T, G, and C is represented by green, red, black and blue, respectively. The nanopore sequencing data showed a single base substitution (CATTAGA) in comparison to the GenBank reference sequence (CATCAGA). The observed base substitution was confirmed by Sanger sequencing, as indicated by the arrow on the chromatogram. (B) The nanopore sequencing data showed a base substitution (CCATTTGT) in comparison to the GenBank reference sequence (CCACTGT) for the genomic RNA of WI-CDC-03041142-001 (GenBank; MT039887.1). This substitution was confirmed by Sanger sequencing (black arrow). (C) Base substitution (GTGGTCT), compared to the GenBank reference (GTGATCT) for the genomic RNA of WI-CDC-03041142-001. This substitution was also confirmed by Sanger sequencing, as shown by the arrow. (D) The nanopore sequencing data (bottom) showed 9 nucleotide base deletions (TAGTGTAGC) in comparison with the GenBank reference sequence (top) for the genomic RNA of WI-CDC-03041142-001, plotted by AliView. (E) The nanopore sequencing data of WI-CDC-03041142-001 showed a mixture of raw reads with and without the 9 bases deletions. (F) Sanger sequencing chromatogram peaks confirmed the mixture of the 9 nucleotide deletions (CGGGCACGTAGTCAATCCATC) and non-deletions (CGGGCACGTAGTGTAGCTAGT). (G) Sanger sequencing confirmed the nanopore sequencing data's base substitution (TTTTTATGAAAAT) in comparison to the GenBank reference (TTTTGTATGAAAAT) for the genomic RNA of CA-CDC-03039618-001 (GenBank; MT039887.1).

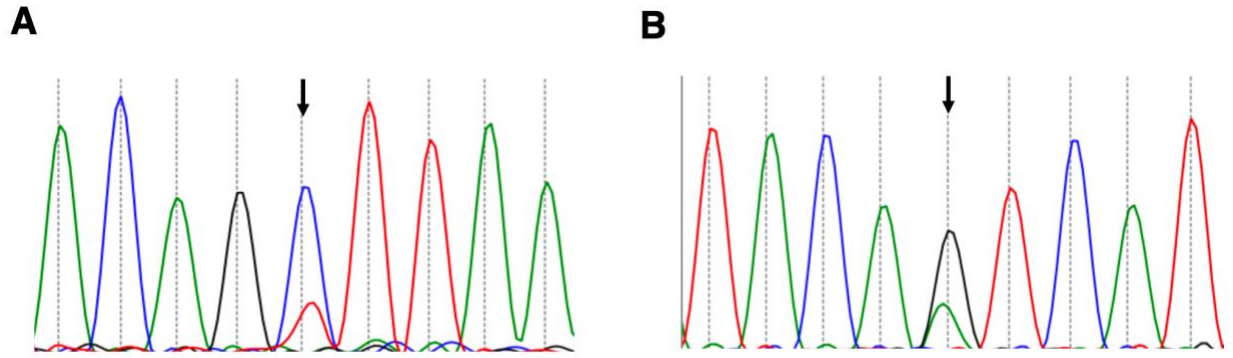

**Supplementary Figure S3. Sanger chromatogram of USA/CA-LAC-USC2**

(A) The nanopore sequencing data showed a base substitution (ACAGTTTAA) in comparison to the Pacbio HiFi reference sequence (ACAGCTTAA) for specimen USA/CA-LAC-USC2 (GISAID: EPI\_ISL\_569665). Sanger chromatogram data showed the mixture of C and T bases at this position, as marked by the arrow. (B) Second base substitution (TACAGGTCAT), compared to the Pacbio HiFi reference (TACAATCAT) for specimen USA/CA-LAC-USC2. These mixed bases were also confirmed by Sanger sequencing, as indicated by the arrow.

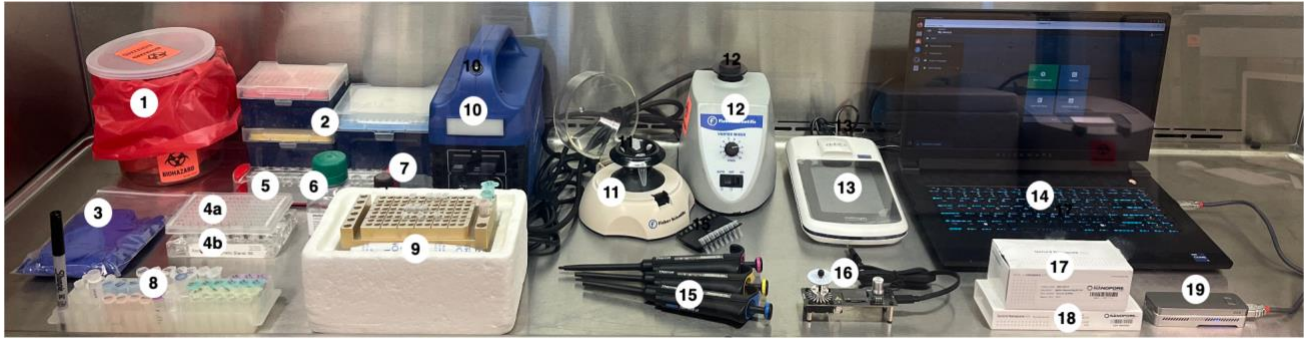

### **Supplementary Figure S4. Portable laboratory for COVID-19 variant tracking**

The portable laboratory's components for SARS-CoV-2 whole genome sequencing within a 1.5x0.5-meter area. Biohazard waster container (1), pipette tips (2), gloves (3), PCR plate (4a), magnets (4b and 5), nuclease-free water (6), fluorescent dye (7), room-temperature reagents and 1.5mL tubes (8), aluminum block with ice pack, heat-sensitive reagents, and PCR tubes (9), battery (10), tabletop centrifuge (11), vortex mixer (12), fluorometer (13), laptop (14), pipettes (15), miniaturized thermocycler (16), end repair, ligation, and sequencing reagents (17), flow cell wash kit (18), and MinION Mk1B portable sequencer and flow cell (19).

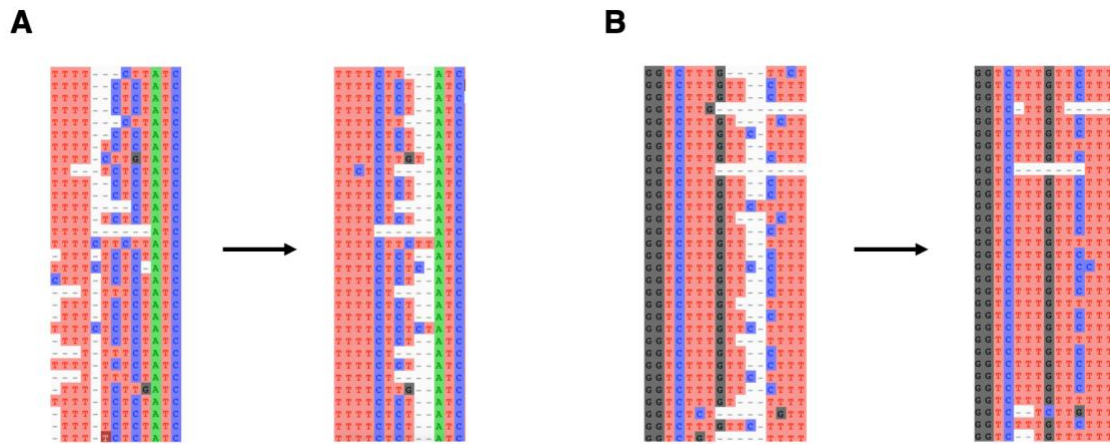

**Supplementary Figure S5. Insertion and mutation error corrections by local realignment**

(A) An insertion error ('I' in 'TTTTICTCTATC') in the consensus sequence of specimen GO2530's reads on the left was corrected by performing a local realignment, resulting in improved alignment of reads on the right. The resulting consensus sequence for this region was 'TTTTCTCTATC', which matched the Pacbio HiFi reference sequence. (B) A mutation error ('I' in 'GGTCTTTGTTITTT') in the consensus sequence of specimen ZI1686's alignment on the left was corrected by conducting a local realignment, resulting in the accurate consensus sequence 'GGTCTTTGTTCTTT'.

## References

1. Park SY, Faraci G, Ward PM, Emerson JF, Lee HY. 2021. High-precision and cost-efficient sequencing for real-time COVID-19 surveillance. *Sci Rep* 11:13669.
2. Katoh K, Misawa K, Kuma K, Miyata T. 2002. MAFFT: a novel method for rapid multiple sequence alignment based on fast Fourier transform. *Nucleic Acids Res* 30:3059-66.
3. Price MN, Dehal PS, Arkin AP. 2010. FastTree 2--approximately maximum-likelihood trees for large alignments. *PLoS One* 5:e9490.
4. Elbe S, Buckland-Merrett G. 2017. Data, disease and diplomacy: GISAID's innovative contribution to global health. *Glob Chall* 1:33-46.
5. Rambaut A, Holmes EC, O'Toole A, Hill V, McCrone JT, Ruis C, du Plessis L, Pybus OG. 2020. A dynamic nomenclature proposal for SARS-CoV-2 lineages to assist genomic epidemiology. *Nat Microbiol* 5:1403-1407.
6. <https://www.who.int/publications/m/item/weekly-epidemiological-update---5-january-2021>.
7. <https://www.who.int/publications/m/item/weekly-epidemiological-update-on-covid-19---15-june-2021>.
